# Supplementary material for: Impact of Elemental Sulfur on the Rhizospheric Bacteria of Durum Wheat Crop Cultivated on a Calcareous Soil
Source: PubMed Central journal article supplement (PMC6843240; doi:10.3390/plants8100379), 2019-09-27
Supplement: plants-08-00379-s001.pdf [file plants-08-00379-s001.pdf]

**Table S1.** List of ARS-producing bacterial isolates and their characteristics, isolated from F- and FBS<sup>0</sup>-crop's rhizosphere.

|        | DAS | Isolate    | P             | Fe | U | Fluo | Biocontrol | 16S rRNA seq             | Accession Number |
|--------|-----|------------|---------------|----|---|------|------------|--------------------------|------------------|
| F-crop | 1   | <b>61</b>  | <b>1.C.4</b>  | -  | - | -    | -          | <i>P. orientalis</i>     | LR027392         |
|        | 2   |            | <b>1.C.23</b> | -  | - | -    | +          | <i>P. orientalis</i>     | LR027393         |
|        | 3   |            | <b>1.C.32</b> | -  | - | -    | +          | <i>P. fluorescens</i>    | LR027394         |
|        | 4   | <b>91</b>  | <b>2.C.10</b> | +  | + | -    | +          | <i>P. thivervalensis</i> | LR027405         |
|        | 5   |            | <b>2.C.13</b> | +  | + | +    | +          | <i>P. moraviensis</i>    | LR027406         |
|        | 6   |            | <b>2.C.14</b> | +  | + | +    | +          | <i>P. moraviensis</i>    | LR027407         |
|        | 7   |            | <b>2.C.16</b> | +  | + | +    | +          | <i>P. thivervalensis</i> | LR027408         |
|        | 8   |            | <b>2.C.17</b> | +  | + | +    | +          | <i>P. koreensis</i>      | LR027409         |
|        | 9   |            | <b>2.C.18</b> | -  | + | +    | +          | <i>P. koreensis</i>      | LR027410         |
|        | 10  |            | <b>2.C.19</b> | +  | + | +    | +          | <i>P. moraviensis</i>    | LR027411         |
|        | 11  |            | <b>2.C.23</b> | +  | + | +    | +          | <i>P. fluorescens</i>    | LR027412         |
|        | 12  | <b>125</b> | <b>3.C.1</b>  | -  | + | +    | -          | <i>P. thivervalensis</i> | LR027424         |
|        | 13  |            | <b>3.C.2</b>  | -  | + | +    | -          | <i>P. fluorescens</i>    | LR027425         |
|        | 14  |            | <b>3.C.3</b>  | -  | + | +    | +          | <i>P. koreensis</i>      | LR027426         |
|        | 15  |            | <b>3.C.4</b>  | +  | + | +    | +          | <i>P. fluorescens</i>    | LR027427         |
|        | 16  |            | <b>3.C.5</b>  | +  | + | +    | +          | <i>P. koreensis</i>      | LR027428         |
|        | 17  |            | <b>3.C.6</b>  | +  | + | +    | +          | <i>P. koreensis</i>      | LR027429         |
|        | 18  | <b>147</b> | <b>4.C.1</b>  | +  | + | -    | +          | <i>P. moraviensis</i>    | LR027438         |
|        | 19  |            | <b>4.C.2</b>  | -  | + | -    | +          | <i>P. koreensis</i>      | LR027439         |
|        | 20  |            | <b>4.C.3</b>  | -  | - | -    | +          | <i>P. koreensis</i>      | LR027440         |
|        | 21  |            | <b>4.C.4</b>  | +  | + | +    | +          | <i>P. koreensis</i>      | LR027441         |
|        | 22  |            | <b>4.C.5</b>  | +  | + | -    | +          | <i>P. fluorescens</i>    | LR027442         |
|        | 23  | <b>188</b> | <b>5.C.2</b>  | +  | + | -    | -          | <i>Bacillus sp</i>       | LR027450         |
|        | 24  |            | <b>5.C.3</b>  | -  | - | -    | -          | <i>P. megaterium</i>     | LR027451         |
|        | 25  |            | <b>5.C.4</b>  | +  | - | -    | -          | <i>P. thivervalensis</i> | LR027452         |
|        | 26  |            | <b>5.C.5</b>  | -  | - | -    | +          | <i>P. thivervalensis</i> | LR027453         |
|        | 27  |            | <b>5.C.6</b>  | +  | - | -    | -          | <i>P. thivervalensis</i> | LR027454         |

|                        |    | DAS | Isolate             | P | Fe | U | Fluo | Biocontrol | 16S rRNA seq                       | Accession Number |
|------------------------|----|-----|---------------------|---|----|---|------|------------|------------------------------------|------------------|
| FBS <sup>0</sup> -crop | 1  | 61  | 1.SG.2              | - | +  | - | +    | -          | <i>P. fluorescens</i>              | LR027395         |
|                        | 2  |     | 1.SG.3              | - | +  | - | -    | -          | <i>Stenotrophomonas rhizophila</i> | LR027396         |
|                        | 3  |     | 1.SG.6              | - | +  | + | +    | -          | <i>P. fluorescens</i>              | LR027397         |
|                        | 4  |     | 1.SG.7              | - | +  | + |      | -          | <i>Bacillus sp.</i>                | LR027398         |
|                        | 5  |     | 1.SG.8              | - | +  | + | +    | -          | <i>P. fluorescens</i>              | LR027399         |
|                        | 6  |     | 1.SG.9              | + | +  | + | +    | -          | <i>P. azotoformans</i>             | LR027400         |
|                        | 7  |     | 1.SG.10             | - | +  | + | -    | -          | <i>Paenibacillus amylolyticus</i>  | LR027401         |
|                        | 8  |     | 1.SG.13             | - | +  | - | +    | -          | <i>Stenotrophomonas rhizophila</i> | LR027402         |
|                        | 9  |     | 1.SG.19             | - | -  | - | +    | -          | <i>P. fluorescens</i>              | LR027403         |
|                        | 10 | 91  | 2.SG.7              | + | +  | + | +    | -          | <i>P. koreensis</i>                | LR027413         |
|                        | 11 |     | 2.SG.8              | + | +  | + | +    | -          | <i>P. koreensis</i>                | LR027414         |
|                        | 12 |     | 2.SG.9              | + | +  | + | +    | -          | <i>P. koreensis</i>                | LR027415         |
|                        | 13 |     | 2.SG.12             | + | +  | - | +    | -          | <i>P. koreensis</i>                | LR027416         |
|                        | 14 |     | 2.SG.13             | + | +  | - | +    | -          | <i>P. koreensis</i>                | LR027417         |
|                        | 15 |     | 2.SG.14             | + | -  | - | +    | -          | <i>P. koreensis</i>                | LR027418         |
|                        | 16 |     | 2.SG.15             | + | +  | - | +    | -          | <i>P. koreensis</i>                | LR027419         |
|                        | 17 |     | 2.SG.16             | + | +  | - | +    | -          | <i>P. koreensis</i>                | LR027420         |
|                        | 18 |     | 2.SG.17             | + | +  | - | +    | -          | <i>P. koreensis</i>                | LR027421         |
|                        | 19 |     | 2.SG.18             | + | +  | + | +    | -          | <i>P. koreensis</i>                | LR027422         |
|                        | 20 |     | 2.SG.20             | + | +  | + | +    | -          | <i>P. koreensis</i>                | LR027423         |
|                        | 21 | 125 | 3.SG.1              | + | +  | + | +    | -          | <i>P. fluorescens</i>              | LR027430         |
|                        | 22 |     | 3.SG.1 <sup>o</sup> | + | +  | + | +    | -          | <i>P. fluorescens</i>              | LR027431         |
|                        | 23 |     | 3.SG.2 <sup>o</sup> | + | +  | + | +    | -          | <i>P. koreensis</i>                | LR027432         |
|                        | 24 |     | 3.SG.9              | + | +  | + | +    | -          | <i>P. koreensis</i>                | LR027433         |
|                        | 25 |     | 3.SG.13             | + | +  | + | +    | -          | <i>P. moraviensis</i>              | LR027434         |
|                        | 26 |     | 3.SG.15             | + | +  | + | +    | -          | <i>P. koreensis</i>                | LR027435         |
|                        | 27 |     | 3.SG.19             | + | +  | + | +    | +          | <i>P. fluorescens</i>              | LR027436         |
|                        | 28 |     | 3.SG.32             | + | +  | + | +    | -          | <i>P. gessardii</i>                | LR027437         |
|                        | 29 | 147 | 4.SG.1              | + | +  | + | -    | -          | <i>P. moraviensis</i>              | LR027443         |
|                        | 30 |     | 4.SG.2              | - | -  | - | -    | -          | <i>Microbacterium oxydans</i>      | LR027444         |
|                        | 31 |     | 4.SG.3              | + | +  | - | +    | -          | <i>P. koreensis</i>                | LR027445         |
|                        | 32 |     | 4.SG.4              | + | +  | - | -    | -          | <i>P. cedrina</i>                  | LR027446         |
|                        | 33 |     | 4.SG.5              | + | +  | + | -    | -          | <i>P. koreensis</i>                | LR027447         |
|                        | 34 |     | 4.SG.6              | + | +  | + | -    | -          | <i>P. koreensis</i>                | LR027448         |
|                        | 35 |     | 4.SG.6S             | - | +  | + | -    | -          | <i>P. koreensis</i>                | LR027449         |
|                        | 36 | 188 | 5.SG.2              | - | -  | + | +    | +          | <i>P. thivervalensis</i>           | LR027455         |
|                        | 37 |     | 5.SG.3              | + | +  | + | -    | +          | <i>Bacillus amyloliquefaciens</i>  | LR027456         |

|    |  |                |   |   |   |   |   |                                   |          |
|----|--|----------------|---|---|---|---|---|-----------------------------------|----------|
| 38 |  | <b>5.SG.6</b>  | - | + | - | - | - | <i>Paenibacillus amylolyticus</i> | LR027457 |
| 39 |  | <b>5.SG.9</b>  | + | + | - | - | - | <i>P. moravensis</i>              | LR027458 |
| 40 |  | <b>5.SG.10</b> | - | - | - | - | + | <i>Paenibacillus polymyxa</i>     | LR027459 |
| 41 |  | <b>5.SG.11</b> | - | - | + | - | - | <i>Cellulosimicrobium funkei</i>  | LR027460 |

**DAS:** days after sowing; **P:** phosphate solubilization; **Fe:** siderophore production; **U:** ureolytic activity.

**Fluo:** Isolates with fluorescent pigment production after growing on King medium B and inspecting under UV light.
